# Supplementary material for: Involvement of miR-214-3p/FOXM1 axis during the progression of psoriasis
Source: Research Square preprint supplement (doi:10.21203/rs.3.rs-196410/v1), 2021-06-02
Supplement: Supplementary file 1 [file ad7b691547be3a81730c07e2.docx]

**Supplementary Materials**

**
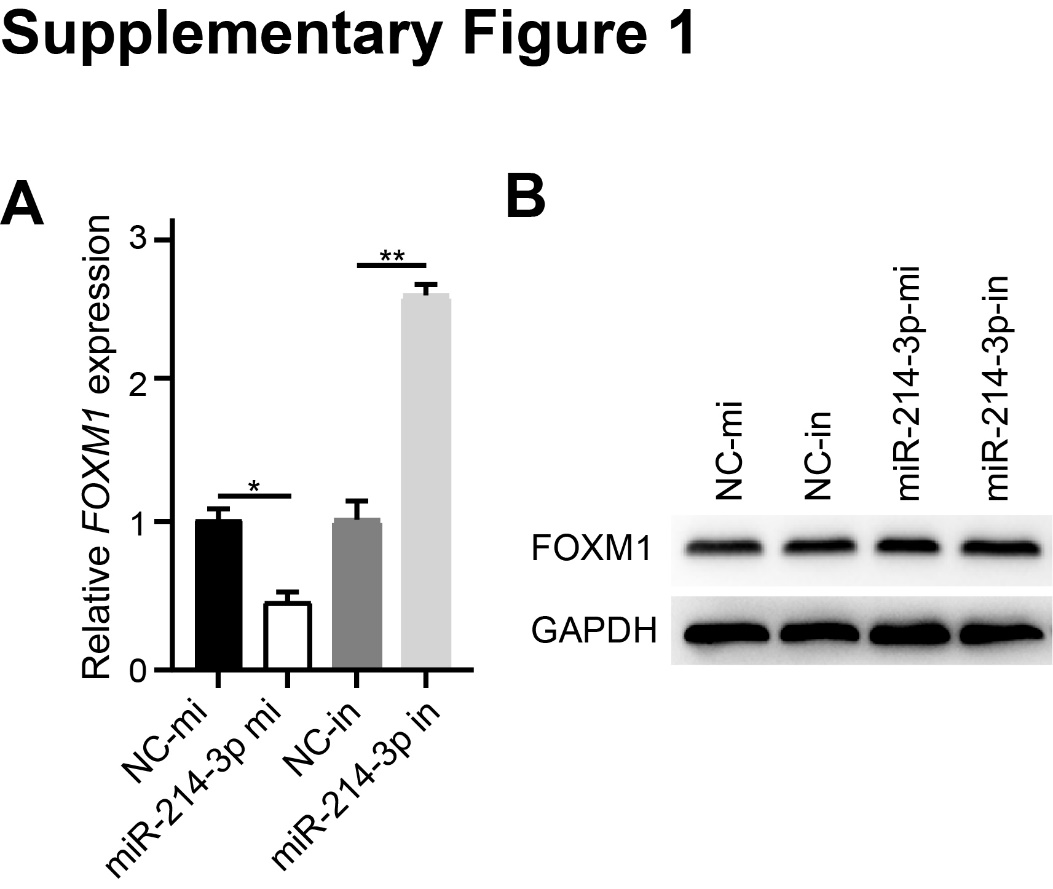
**

**Supplementary Figure 1. FOXM1 is negatively regulated by miR-214-3p.** RT-qPCR(**A**)and western blotting (**B**)analysis of FOXM1 expression in HaCaT cells transfected with NC-mi, NC-in, miR-214-3p mi, and miR-214-3p in. NC-mi was used as control to analyze the expression of *FOXM1*. Data are presented as mean ± s.e.m. **p* < 0.05, ***p* < 0.01.
